# Supplementary material for: Prenylated Trans-Cinnamic Esters and Ethers against Clinical Fusarium spp.: Repositioning of Natural Compounds in Antimicrobial Discovery
Source: PubMed Central journal article supplement (PMC7865625; doi:10.3390/molecules26030658), 2021-01-27
Supplement: molecules-26-00658-s001.pdf [file molecules-26-00658-s001.pdf]

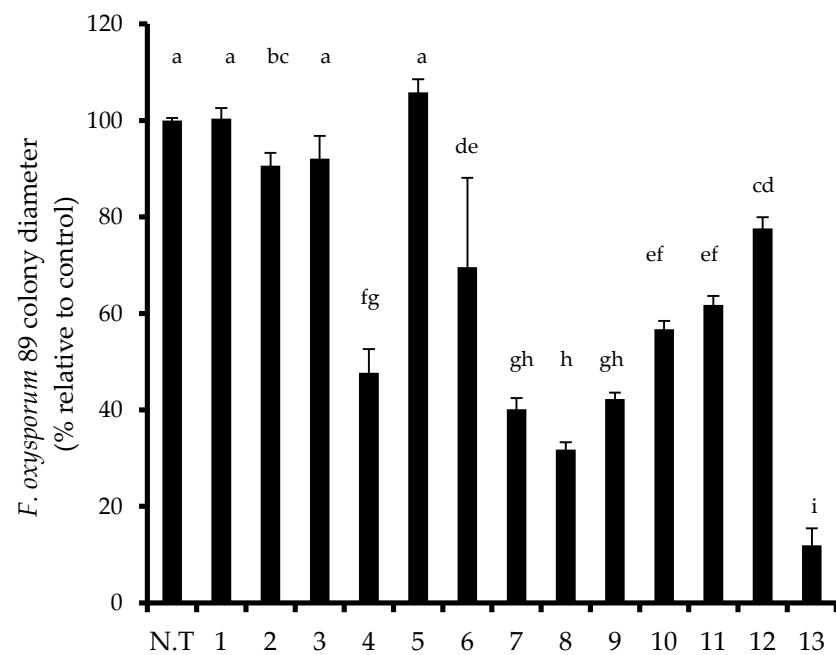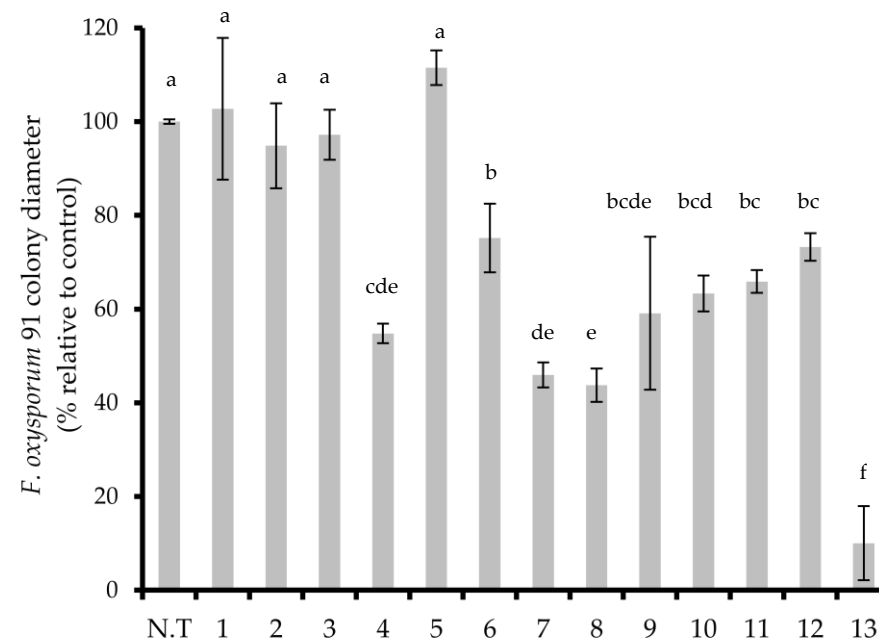

Figure S1. Antifungal activity of compounds 1-13 against FO5C.

\*N.T: Not treated (drug-free test).

Compounds that do not share the same letter are statistically different at  $P < 0.05$ .

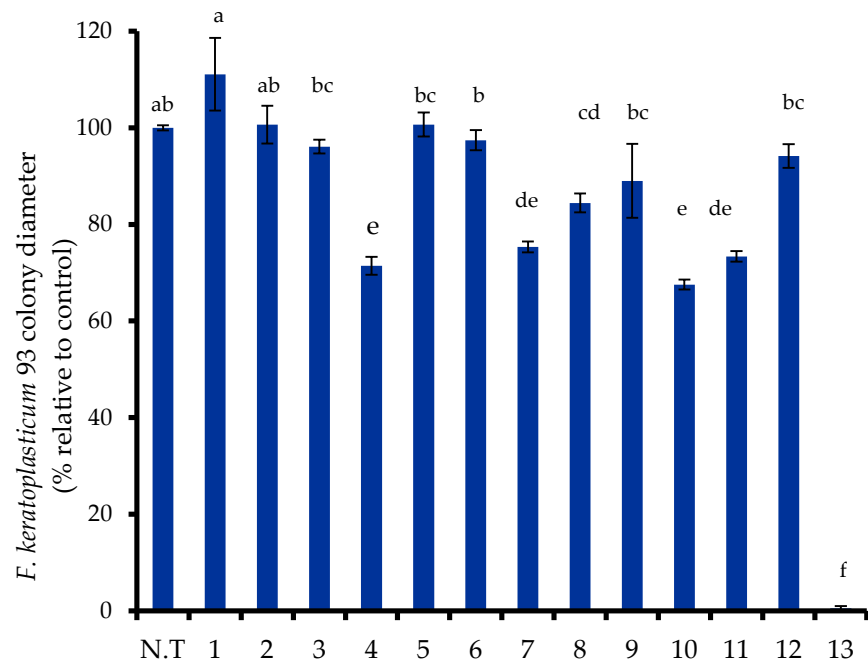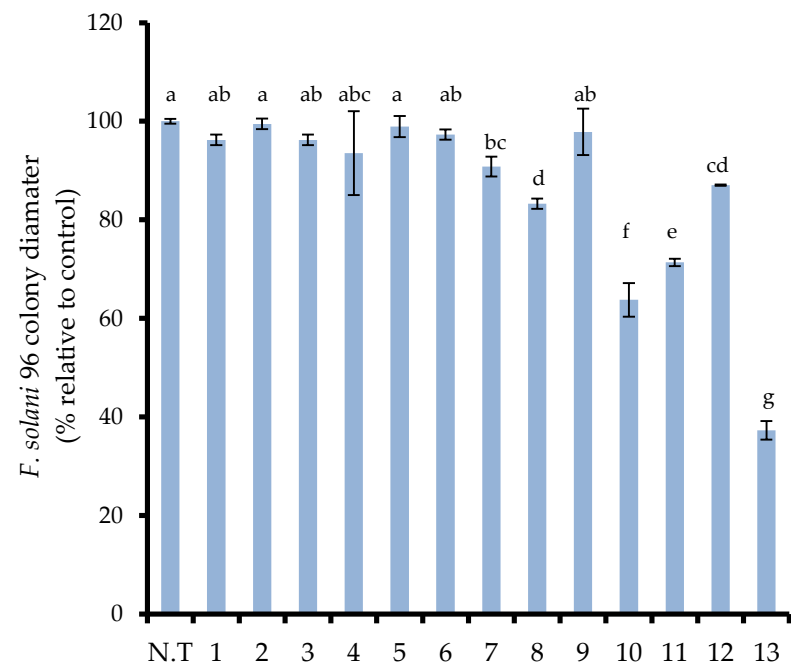

Figure S2. Antifungal activity of compounds 1-13 against FSSC.

\*N.T: Not treated (drug-free test).

Compounds that did not share the same letter are statistically different at  $P < 0.05$ .

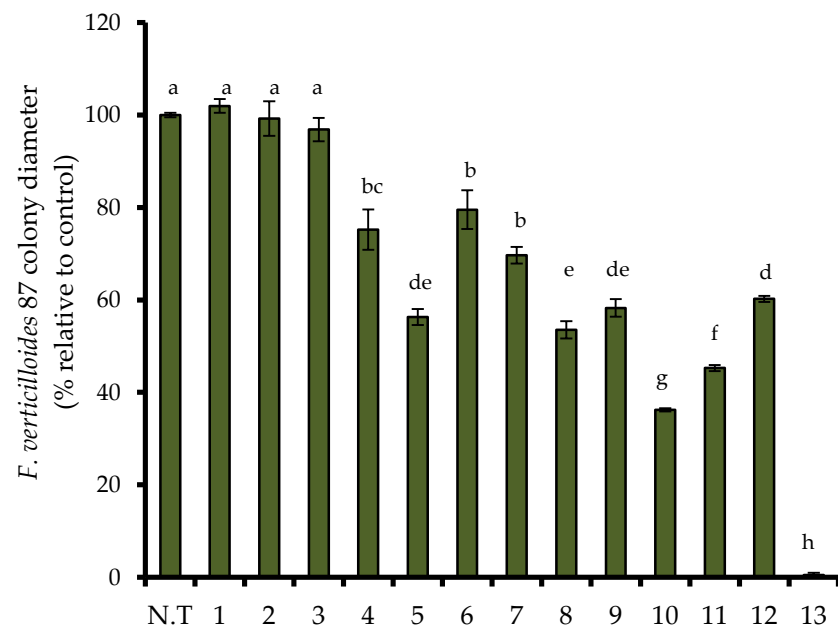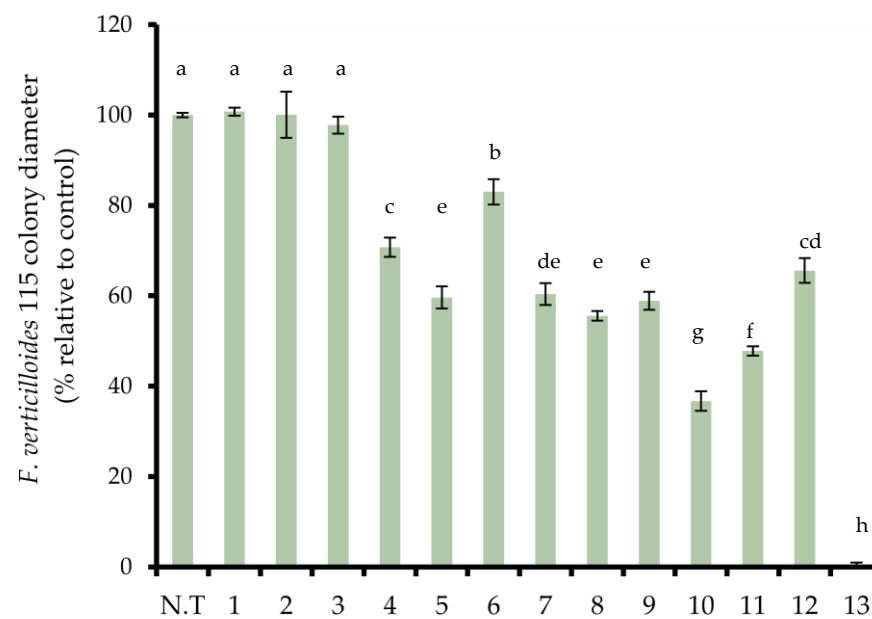

Figure S3. Antifungal activity of compounds 1-13 against FFSC.

\*N.T: Not treated (drug-free test).

Compounds that did not share the same letter are statistically different at  $P < 0.05$ .

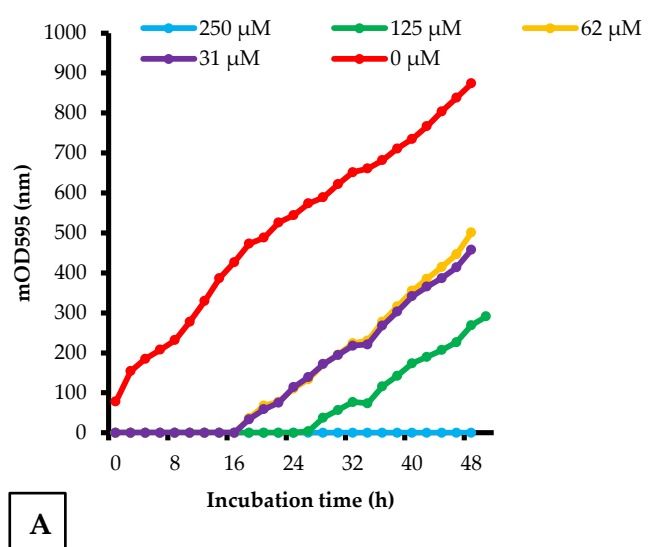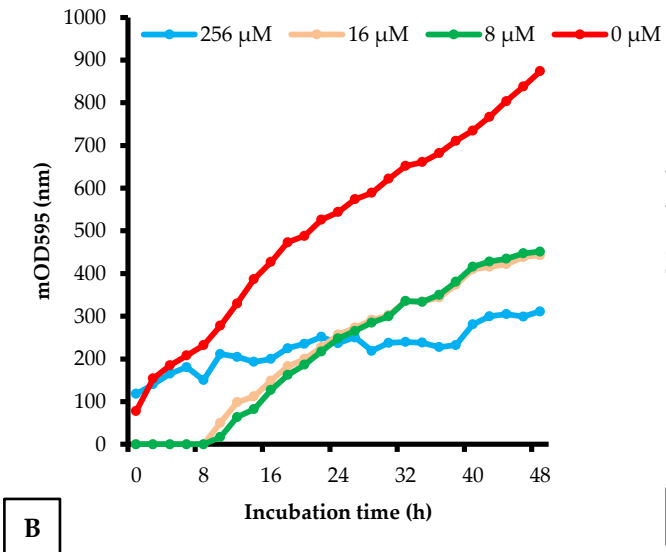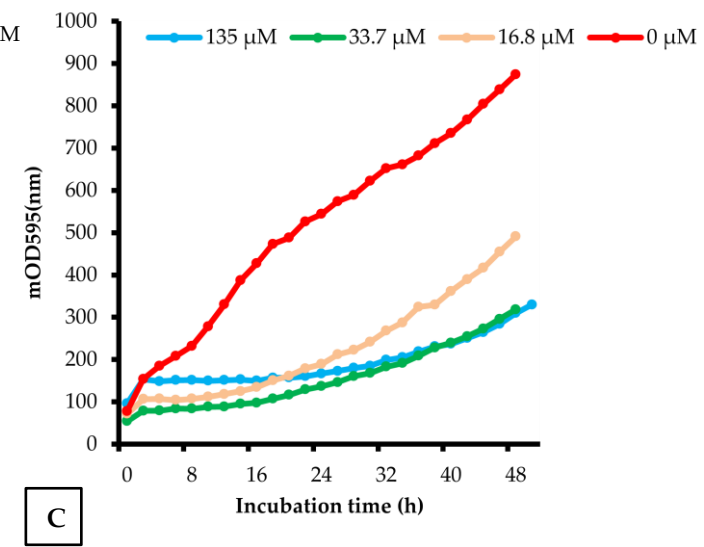

Figure S4. MIC and LD<sub>50</sub> ranges expressed as absorbance (milliOD) at 595 nm at 48 h of Ester **13** (A), TRB (B) and AmB (C) against *F. oxysporum* 89.

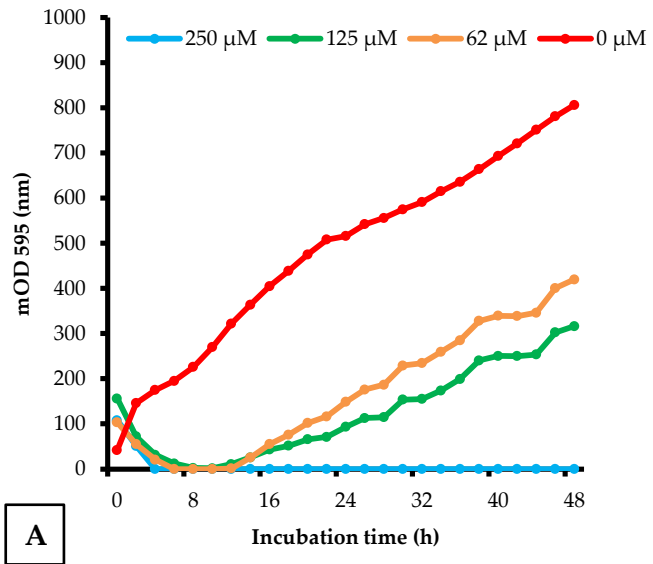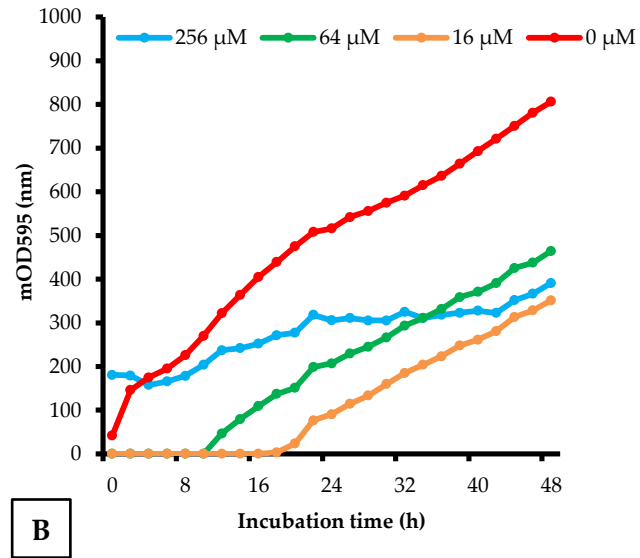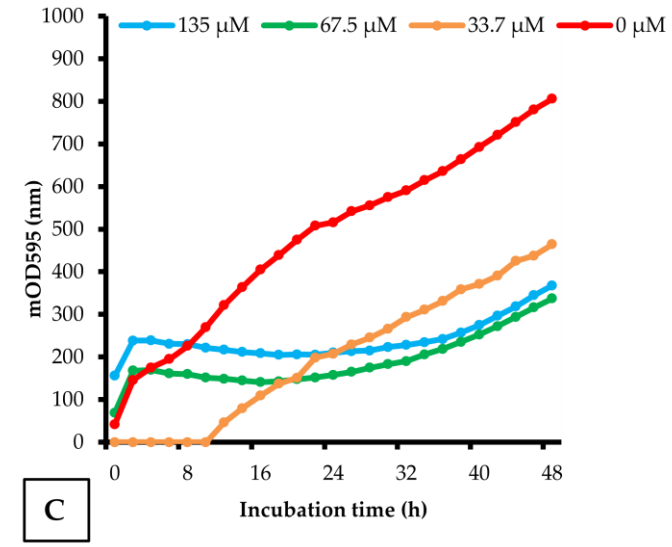

Figure S5. MIC and LD<sub>50</sub> ranges expressed as absorbance (milliOD) at 595 nm at 48 h of Ester 13 (A), TRB (B) and AmB (C) against *F. oxysporum* 91.

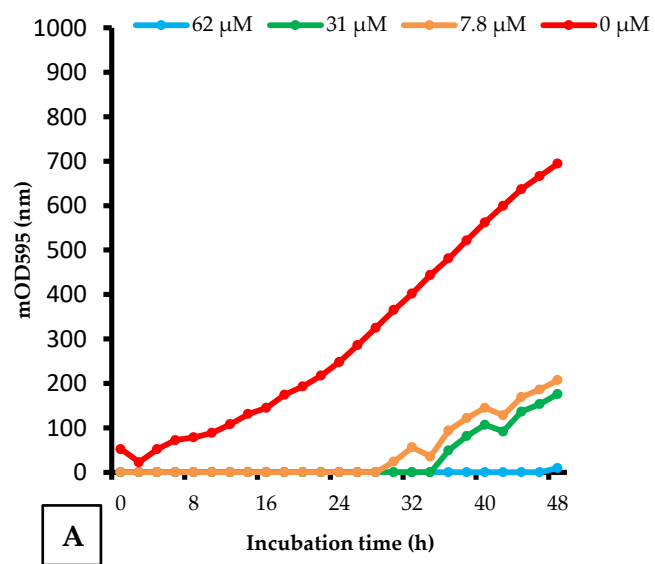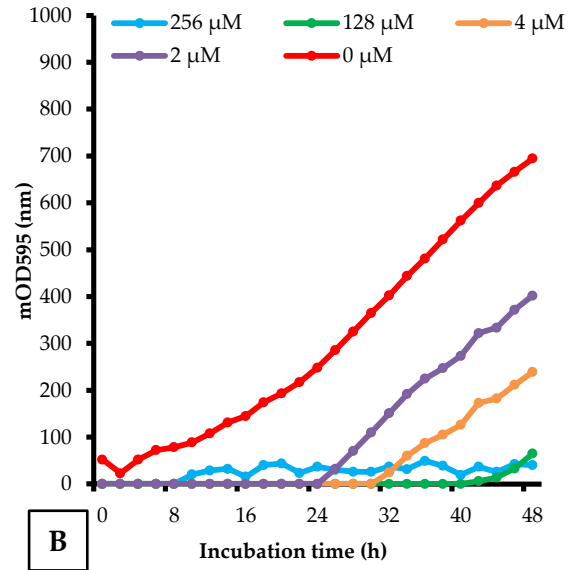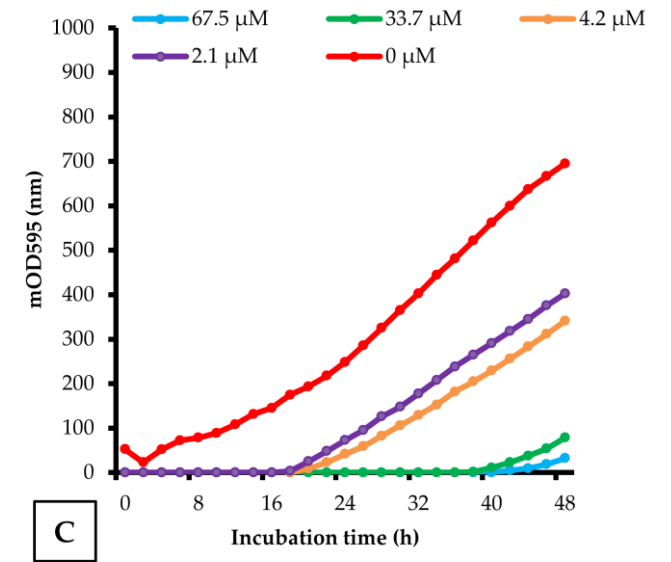

Figure S6. MIC and LD<sub>50</sub> ranges expressed as absorbance (milliOD) at 595 nm at 48 h of Ester 13 (A), TRB (B) and AmB (C) against *F. keratoplasicum* 93.

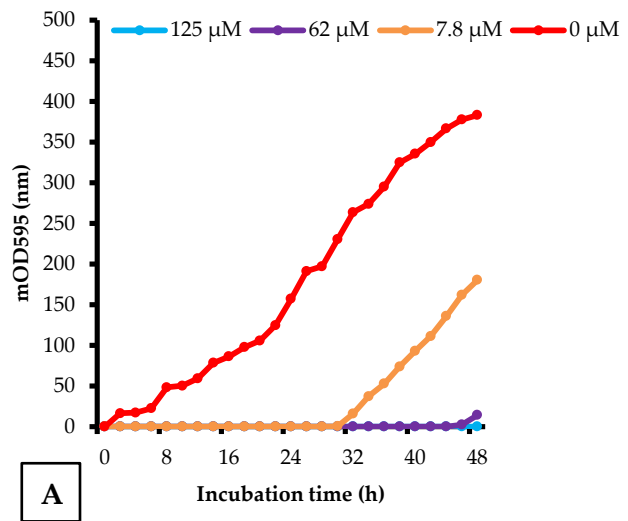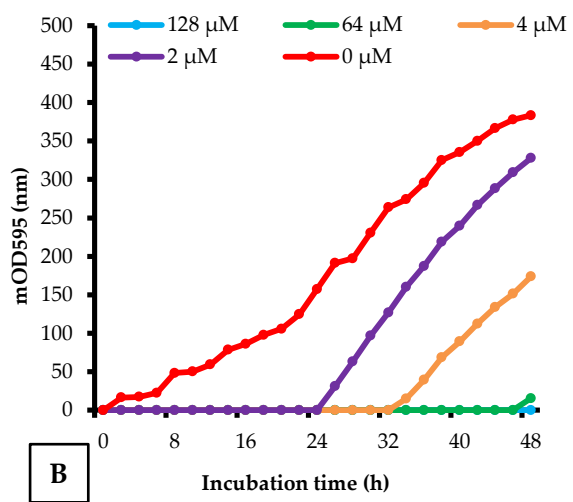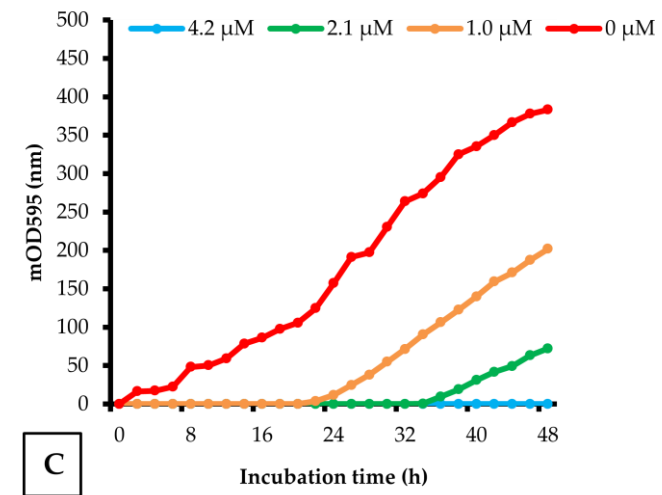

Figure S7. MIC and LD<sub>50</sub> ranges expressed as absorbance (milliOD) at 595 nm at 48 h of Ester **13** (A), TRB (B) and AmB (C) against *F. solani* 96.

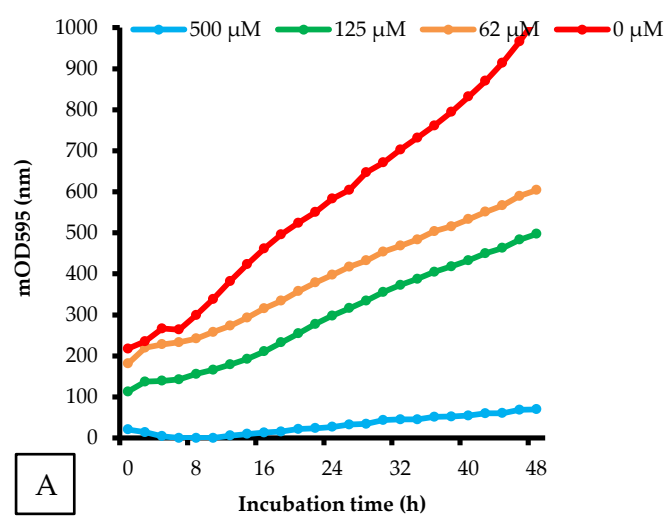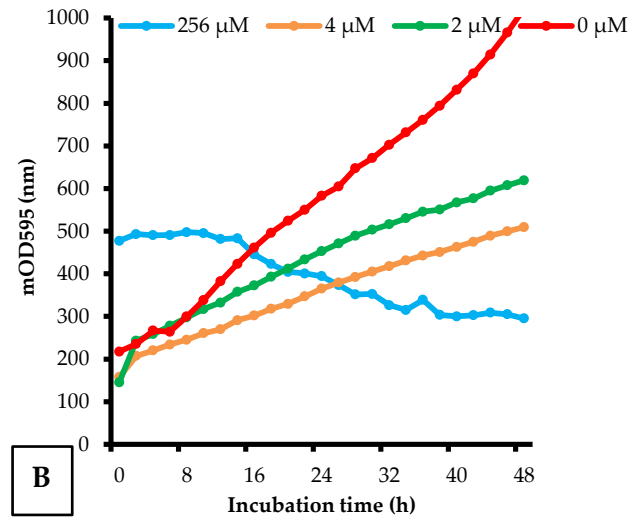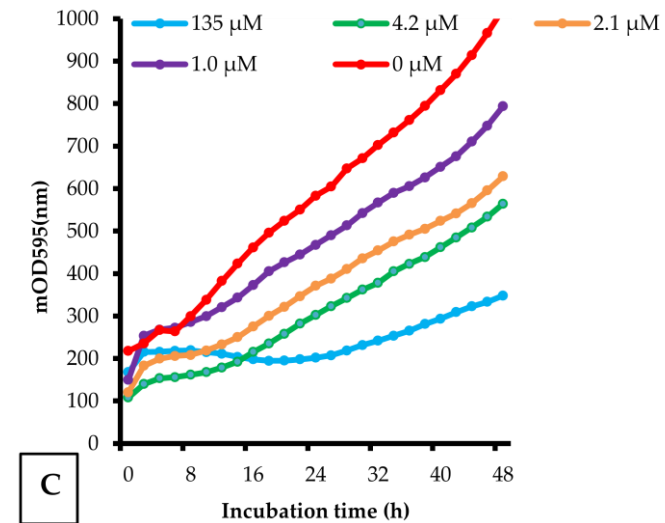

Figure S8. MIC and LD<sub>50</sub> ranges expressed as absorbance (milliOD) at 595 nm at 48 h of Ester 13 (A), TRB (B) and AmB (C) against *F. verticillioides* 87.



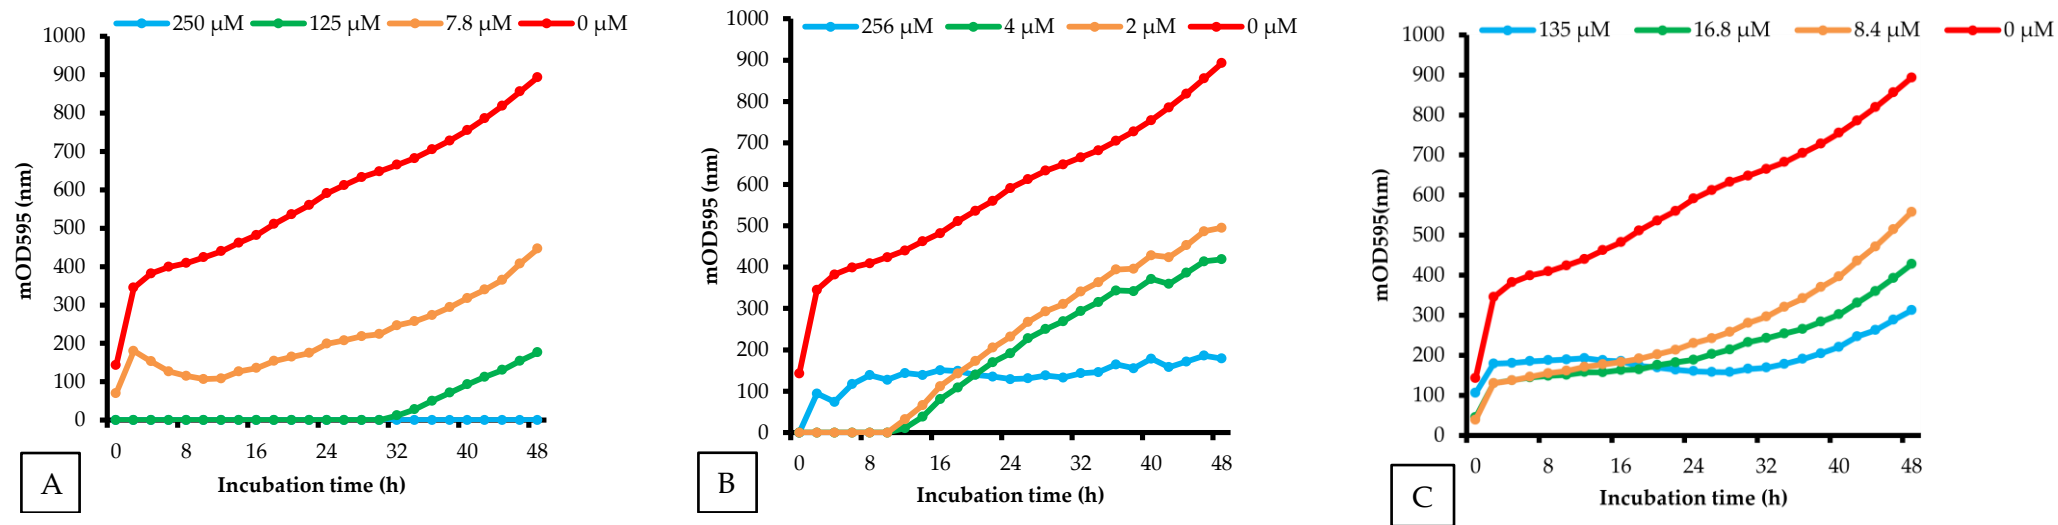

Figure S9. MIC and LD<sub>50</sub> ranges expressed as absorbance (milliOD) at 595 nm at 48 h of Ester 13 (A), TRB (B) and AmB (C) against *F. verticillioides* 115.
